# Supplementary material for: Exposure to solvent vapours for enhanced N-type OTFT stability
Source: Royal Society of Chemistry journal article supplement (doi:10.1039/d3ma00402c), 2023-01-01
Supplement: d3ma00402c1.pdf [file d3ma00402c1.pdf]

## Supplementary Information

### Exposure to Solvent Vapours for Enhanced N-type OTFT Stability

*Samantha Brixl<sup>1</sup>, Halynne R. Lamontagne<sup>1,2</sup>, Benjamin King<sup>1</sup>, Adam J. Shuhendler<sup>2,3,4</sup> and Benoît H. Lessard<sup>1,5\*</sup>*

1. University of Ottawa, Department of Chemical and Biological Engineering, 161 Louis Pasteur, Ottawa, ON, Canada
2. University of Ottawa, Department of Chemistry and Biomolecular Sciences, 150 Louis Pasteur, Ottawa, ON, Canada
3. University of Ottawa, Department of Biology, 30 Marie Curie, Ottawa, ON, Canada
4. University of Ottawa Heart Institute, 40 Ruskin St, Ottawa, ON, Canada
5. University of Ottawa, School of Electrical Engineering and Computer Science, 800 King Edward Ave, Ottawa, ON, Canada

\*Corresponding Author. E-mail: [benoit.lessard@uottawa.ca](mailto:benoit.lessard@uottawa.ca)

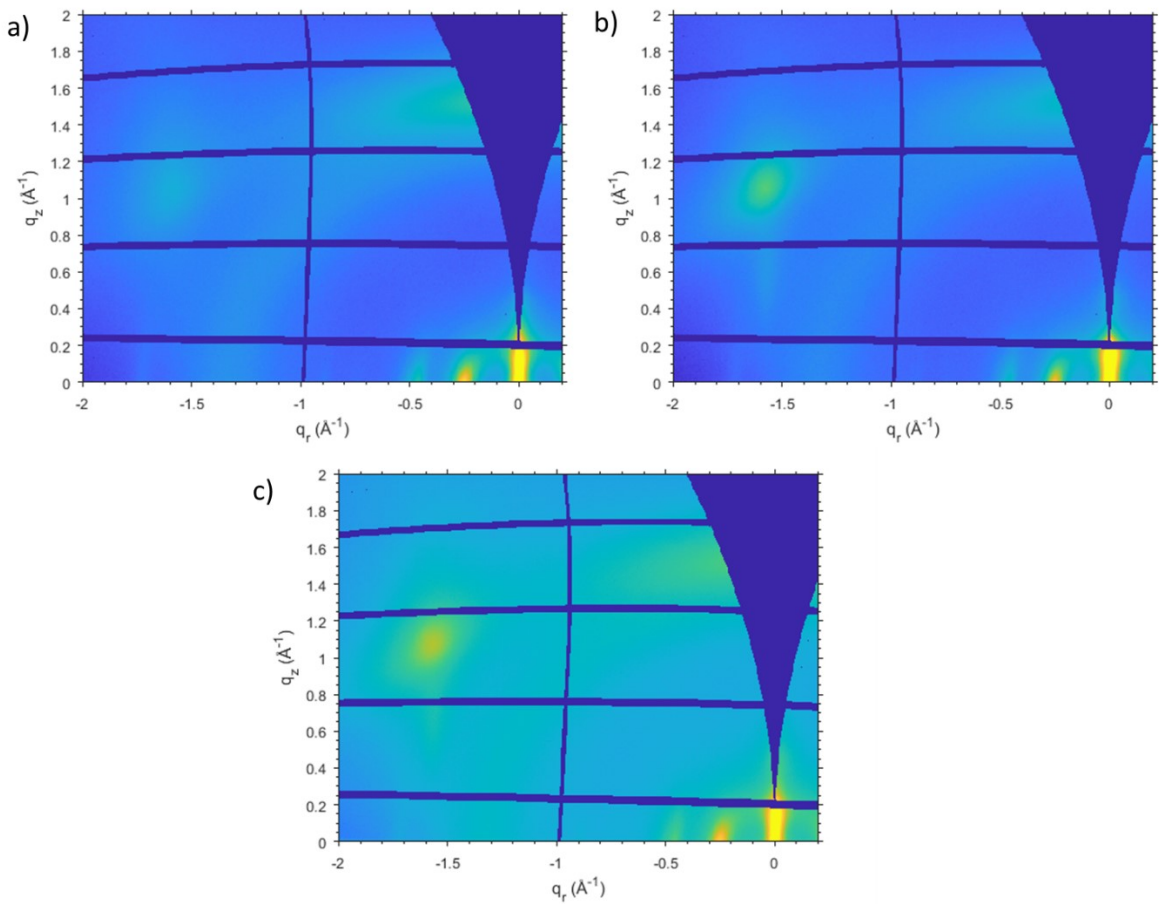

**Figure S1:** GIWAXS scattering patterns of P(NDI2OD-T2). (a) Baseline, (b) Aniline-exposed, (c) Pyridine-exposed

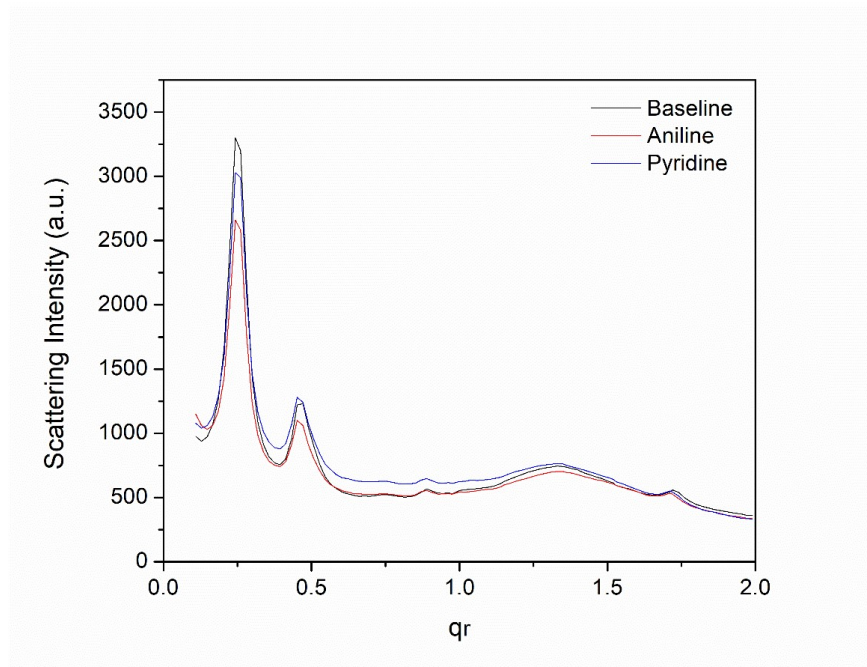

**Figure S2:** Linecuts of GIWAXS in-plane scattering between  $0.01 \leq q_z \leq 0.2$ .

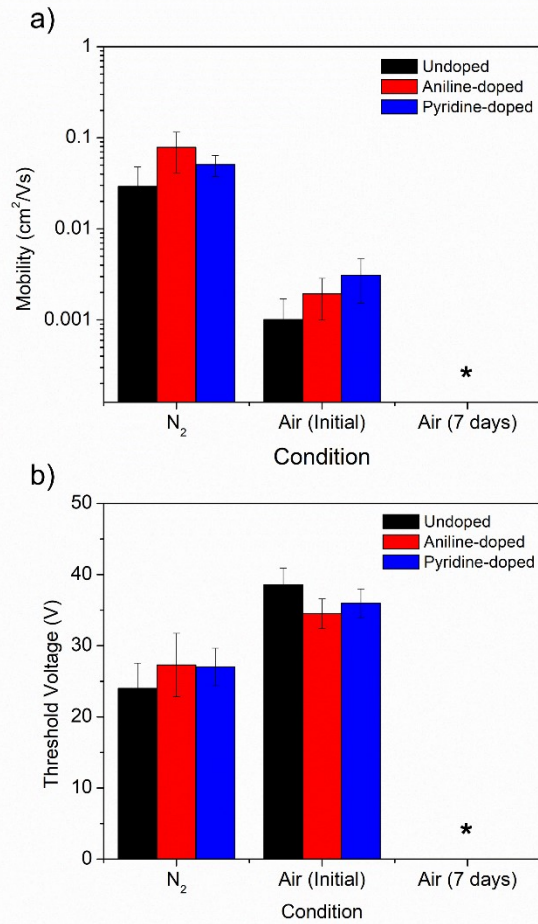

**Figure S3:** Stability of P(NDI2OD-T2) devices over one week. a) Device electron mobility. b) Device threshold voltage.
